# Supplementary material
Source: PubMed Central journal article supplement (PMC8524758)

**A**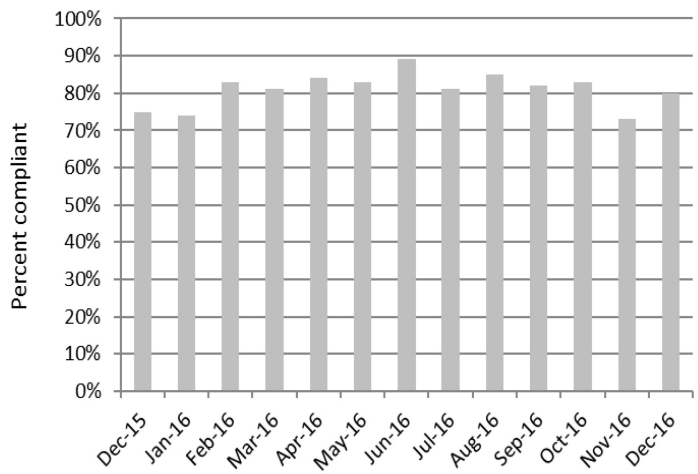**D**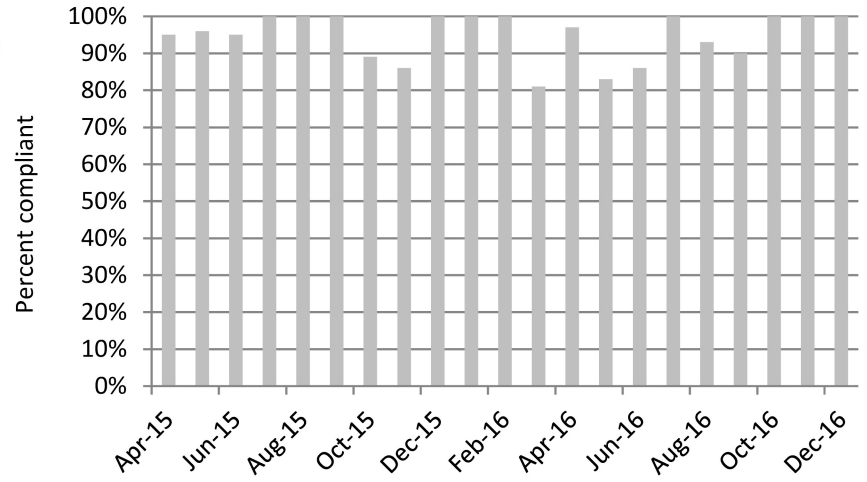**B**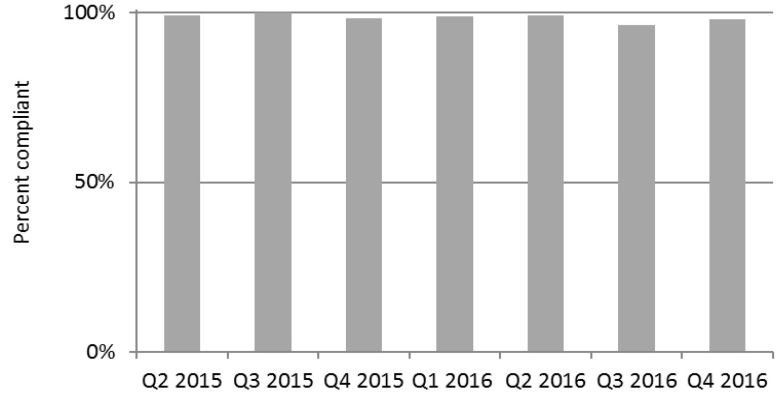**C**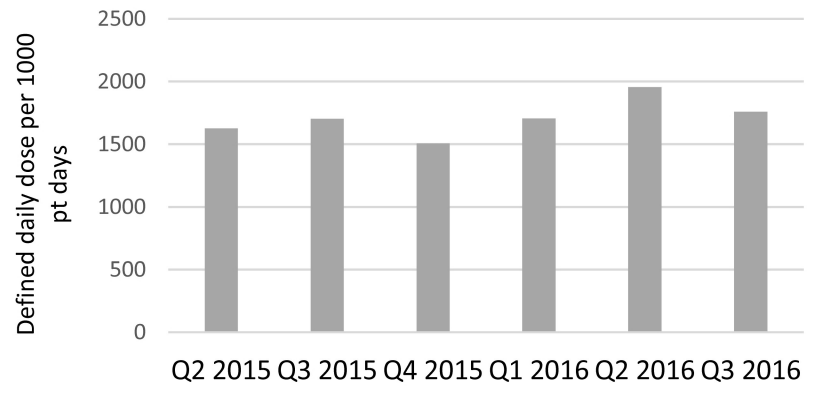

Supplement: NIHMS1631547-supplement-Figure_3A-_D.pdf [file NIHMS1631547-supplement-Figure_3A-_D.pdf]
